# Supplementary material for: Atomic force microscopy reveals the mechanical properties of breast cancer bone metastases
Source: Royal Society of Chemistry journal article supplement (doi:10.1039/d1nr03900h), 2021-01-01
Supplement: d1nr03900h1.pdf [file d1nr03900h1.pdf]

# SUPPORTING MATERIAL

## Atomic force microscopy reveals the mechanical properties of breast cancer bone metastases

Xinyue Chen,<sup>1,2,3</sup> Russell Hughes,<sup>2</sup> Nic Mullin,<sup>1,3</sup> Rhoda J. Hawkins,<sup>1,3</sup> Ingunn Holen,<sup>2</sup>  
Nicola J. Brown<sup>2</sup> and Jamie K. Hobbs<sup>1,3,\*</sup>

<sup>1</sup> Department of Physics and Astronomy, University of Sheffield, UK

<sup>2</sup> Department of Oncology and Metabolism, University of Sheffield, UK

<sup>3</sup> The Krebs Institute, University of Sheffield, UK

\* Corresponding author: Jamie K. Hobbs, email: [jamie.hobbs@sheffield.ac.uk](mailto:jamie.hobbs@sheffield.ac.uk)

|                                                    |          |
|----------------------------------------------------|----------|
| <b>SUPPORTING DATA AND METHODS</b> .....           | <b>2</b> |
| Mechanical data represented by mean $\pm$ std..... | 2        |
| Validation of the mechanical heterogeneity.....    | 2        |
| Effect of finite sample thickness correction.....  | 2        |
| Immunofluorescent imaging and image analysis.....  | 3        |
| Top view optics combined with AFM .....            | 4        |
| AFM long Z scanner.....                            | 4        |
| <b>SUPPORTING REFERENCE</b> .....                  | <b>5</b> |
| <b>SUPPORTING FIGURES</b> .....                    | <b>6</b> |

## SUPPORTING DATA AND METHODS

### Mechanical data represented by mean $\pm$ std

Application of a normality test shows that all of the mechanical data are non-parametric, so we have presented data as median value with a range in the main text. For completeness, we include mean values  $\pm$  standard deviations here. The mean values  $\pm$  standard deviations of  $E_{H-s}$ ,  $E_{K-v}$  and  $\eta$  for different samples are: (1) metastatic tumour (MT):  $17 \pm 44$  Pa,  $65 \pm 145$  Pa,  $25 \pm 34$  Pa·s; (2) subcutaneous tumour (SCT):  $26 \pm 74$  Pa,  $145 \pm 248$  Pa,  $52 \pm 119$  Pa·s; (3) MDA-MB-231 cells:  $204 \pm 138$  Pa,  $766 \pm 552$  Pa,  $205 \pm 131$  Pa·s; (4) bone surrounding tumour:  $75 \pm 182$  Pa,  $140 \pm 172$  Pa,  $79 \pm 149$  Pa·s; (5) bone w/o tumour:  $165 \pm 862$  Pa,  $452 \pm 2947$  Pa,  $108 \pm 204$  Pa·s. The standard deviations often exceed the mean values due to the data distributions being non-parametric.

### Validation of the mechanical heterogeneity

Due to the hierarchical factors (i.e. number of repeated force curves, measured positions, pieces of sample and animals) and non-parametric data involved in this study, it is challenging to calculate the sample size without excessive assumptions. However, some estimations can help to validate the statistical reliability. Firstly, the number of animals was above the minimum required for statistical comparison.<sup>1</sup> Moreover, the median and mean values of the mechanical properties were calculated for each sample (i.e. one piece of split bone surface or one slice of subcutaneous tumour) from all measured positions within the regions of interest in the sample. Histograms representing the median and mean data and hence the variability, for the properties quantified in all of the samples are shown in Figure S2. Although the distributions cover approximately 1 to 2 order of magnitude, they are significantly narrower than the corresponding mechanical distributions, based on each measured position (as in Figure S3). This indicates that the data presented in the main text reveals the mechanical heterogeneity within each region of interest in tissues, as opposed to solely reflecting the variations between samples.

### Effect of finite sample thickness correction

Large radius spherical probes were selected for use in this study to provide sufficient force sensitivity while indenting the extremely soft samples. Hertz-Sneddon analysis for analysing the force-indentation curves has appropriately corrected the effect of a large contact area in the resultant modulus.<sup>2</sup> Moreover, the effect of finite sample thickness (compared to the large probe radius) on the elasticity measured by indentation (i.e.  $E_{H-s}$ ) should be taken into account,

which is estimated by a commonly used method.<sup>3</sup> Such correction is negligible for measurements on tissues, because the sample thickness of tissues is typically about 1 mm or above that is far greater than the radius (12.5  $\mu\text{m}$ ) of our AFM probe. The finite thickness correction, if applied, gives less than 1% reduction in  $E_{H-S}$  at our largest detected indentation depth. For single cultured cells (assume cell height = 6  $\mu\text{m}$ , as often observed<sup>4</sup>), the finite thickness correction leads to a moderate reduction of the modulus (e.g. 39% at the indentation depth corresponding to median  $E_{H-S}$ ). The histogram of corrected  $E_{H-S}$  is shown in Figure S4. It is notable that the finite thickness correction has no impact on the statistical comparisons between MDA-MB-231 cells and tumour tissues.

### **Immunofluorescent imaging and image analysis**

Bone tissue was fixed and maintained in 4% paraformaldehyde (PFA) at 4°C, following analysis by AFM. Fixed bones were decalcified in 0.5 M EDTA pH 7.5 overnight at 4°C. Decalcified bones were equilibrated in cryoprotectant (20% sucrose and 2% PVP in PBS) overnight at 4°C before being embedded in gelatin (8% porcine gelatin, 20% sucrose and 2% PVP in PBS) at 60°C and then stored at -80°C. Gelatin-embedded bones were cut into 30  $\mu\text{m}$  thick cryo-sections and immunofluorescent staining was performed on three non-sequential sections. For immunofluorescent labelling, cryo-sections were defrosted, rehydrated in PBS, permeabilised in 0.3% Triton-X100 for 20 minutes at ambient temperature, washed in PBS and treated with a streptavidin/biotin blocking kit (Vector Labs, CA, USA). Tissue sections were then incubated with rabbit polyclonal primary antibodies against Collagen I, Collagen IV and Laminin (AbCam, Cambridge, UK) at a concentration of 10  $\mu\text{g}/\text{mL}$  for 2 hours at ambient temperature. Tissue sections were then incubated with biotinylated goat anti-rabbit secondary (5  $\mu\text{g}/\text{mL}$ ) for 1 hour at ambient temperature, washed with PBS and incubated with Alexa Fluor 555-conjugated streptavidin (10  $\mu\text{g}/\text{mL}$ ) for 30 minutes (Thermo Fisher Scientific, MA, USA). Labelled sections were stained with DAPI, washed in PBS and mounted in ProLong Diamond antifade (Thermo Fisher Scientific, MA, USA).

Cryo-sections from subcutaneous tumours were defrosted and fixed in 4% PFA solution at ambient temperature for 10 minutes, permeabilised with 0.1% Triton X-100 for 5 mins, then washed in PBS. Subcutaneous tumour cryo-sections were then immuno-fluorescently labelled as described above.

Images of stained tissue sections were acquired using a Zeiss LSM 980 (Zeiss Group, Germany) confocal system. Sections from more than 3 tissues for each sample type were imaged. For bone sections, imaging was focused on the metaphysis region.

Images were analysed using ImageJ (National Institute of Health, US) to quantify the fluorescently labelled extracellular components. Statistical analyses were performed using Prism software (v.8.0, GraphPad Software, La Jolla, CA, USA). All data are presented as sample means  $\pm$  SEM and were analysed using one-way ANOVA. A statistically significant difference was defined as  $p < 0.05$ .

### **Top view optics combined with AFM**

The opaque samples studied here required top view optics capable of both conventional and fluorescence imaging with a wide field of view. A bespoke mount was used to secure a simple optical microscope onto the condenser stage of a Nikon Eclipse Ti. 25.4 mm diameter cemented achromatic doublets (Thorlabs) with focal lengths of 75 mm and 200 mm were used for the objective and tube lenses, respectively, to give a 2.67x magnification and a field of view of approximately 1.8 mm x 1.35 mm with the camera used (ImagingSource DFK31BF03, 1/3" sensor). The ~67 mm working distance of the objective lens was sufficient to allow imaging through the AFM head. A filter holder was placed in the infinity space between the objective and tube lenses for the emission filter. To minimise contrast loss from scattered light from the optical components in the AFM head, oblique illumination was used, provided by a CoolLED pE300 light source and delivered via a liquid light guide whose output was passed through the excitation filter, then weakly focused and steered onto the sample surface through the gap between the AFM head and stage using a kinematic tip/tilt mount. A photograph of the top view optics and AFM setup is shown in Figure S6.

### **AFM long Z scanner**

Due to the large topography and extremely compliant nature of the samples, the 15  $\mu\text{m}$  range of the Z piezo in the AFM head was not sufficient. In our setup, the Z piezo in the AFM head was disabled, and the sample was mounted on Z piezo stage with 100  $\mu\text{m}$  of range (P-621, Physik Instrumente), which was controlled by the low voltage Z signal from the AFM passed through a high voltage amplifier (PI E500 with E505 HVA and E509 signal conditioner/piezo servo module, Physik Instrumente). Closed loop control was implemented in the E509, and the sensor monitor signal was passed to the AFM controller through the signal access module.

The long Z stage was calibrated by scanning 3 separate silicon calibration gratings in tapping mode, using the Z piezo in the AFM head and then the long Z stage immediately afterwards. A calibration factor to fix the calibration of the long Z stage such that the height sensor signal from the long Z stage matched that from the (factory calibrated) height sensor in the AFM head

was calculated from height histograms of these measurements and set in the software. The measurement of the grating with the Z piezo within the AFM head agreed with the height specifications of the gratings within the manufacturer's specified tolerances, and measurements after calibration showed agreement to within better than 0.5% between the calibrated long Z stage and the Z piezo in the AFM head.

A bespoke aluminium mounting plate was made to fit onto the chassis of the Nikon Eclipse Ti microscope in place of the standard AFM sample stage. A micrometer controlled XY stage (XYT1/M, Thorlabs) was mounted on this, to allow positioning of the sample relative to the AFM head. The long Z stage was mounted on top of this. On top of the long Z stage, a bespoke acrylic plate was used to stop any ingress of buffer into the stage from accidental spillages or leaks. A thin-film resistive heating element encapsulated in Kapton (KHA, 1.5 inch diameter, Omega Engineering) was glued to the top surface of acrylic plate with epoxy resin, and a bespoke copper petri-dish holder was glued to the top surface of the heater with thermal epoxy, to transfer heat to the sample in a petri dish. A Pt100 platinum resistance sensor, encapsulated in either glass (1PT100GO1020HG Omega Engineering) or alumina (HEL-705-T-0-12-00, Honeywell) was placed in the petri dish and held in place by a magnet glued to the sensor (glass encapsulated) or a small arm held in place by a magnet outside the dish (alumina encapsulated) and immersed in buffer. A commercial temperature controller (HTHS, JPK, which used a Eurotherm 2216e controller) was re-tuned to control the system, and found to maintain the temperature to within +/- 0.5 degrees of the set temperature by independent measurement with a type K thermocouple and DAQ card. A photograph of the constructed stage is shown in Figure S7.

#### **SUPPORTING REFERENCE**

1. W. N. Arifin and W. M. Zahiruddin, *Malays J Med Sci*, 2017, **24**, 101-105.
2. I. N. Sneddon, *Int. J. Eng. Sci.*, 1965, **3**, 47-57.
3. E. K. Dimitriadis, F. Horkay, J. Maresca, B. Kachar and R. S. Chadwick, *Biophysical Journal*, 2002, **82**, 2798-2810.
4. J. Albon, Unpublished doctoral thesis, University of Sheffield, 2015.

## SUPPORTING FIGURES

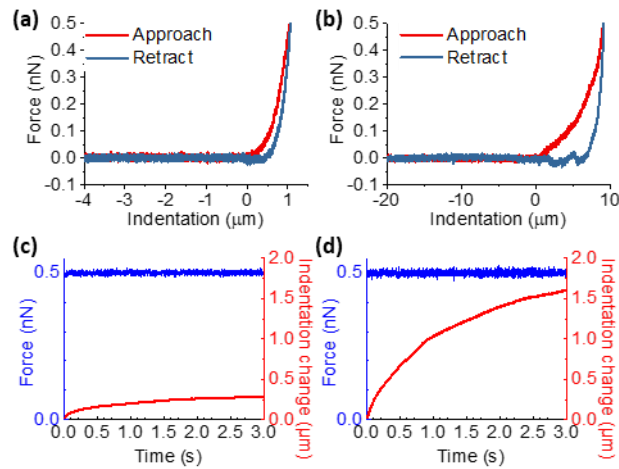

**Figure S1.** Example force vs. indentation curves obtained during AFM probe approach (*red*) and retract (*blue*), taken on (a) MDA-MB-231 cell and (b) metastatic tumour in bone. Negative indentation represents tip-surface distance before contact. Note the different scales in x-axes. (c-d) The creep curves (indentation change vs. time under constant applied force) obtained from the dwell segment of force curves. (c) was acquired at the same position as (a) and (d) at the same position as (b). The applied force (*light blue*) was held constant for 3 s while the indentation depth increased (*red*) due to the material being viscoelastic rather than purely elastic.

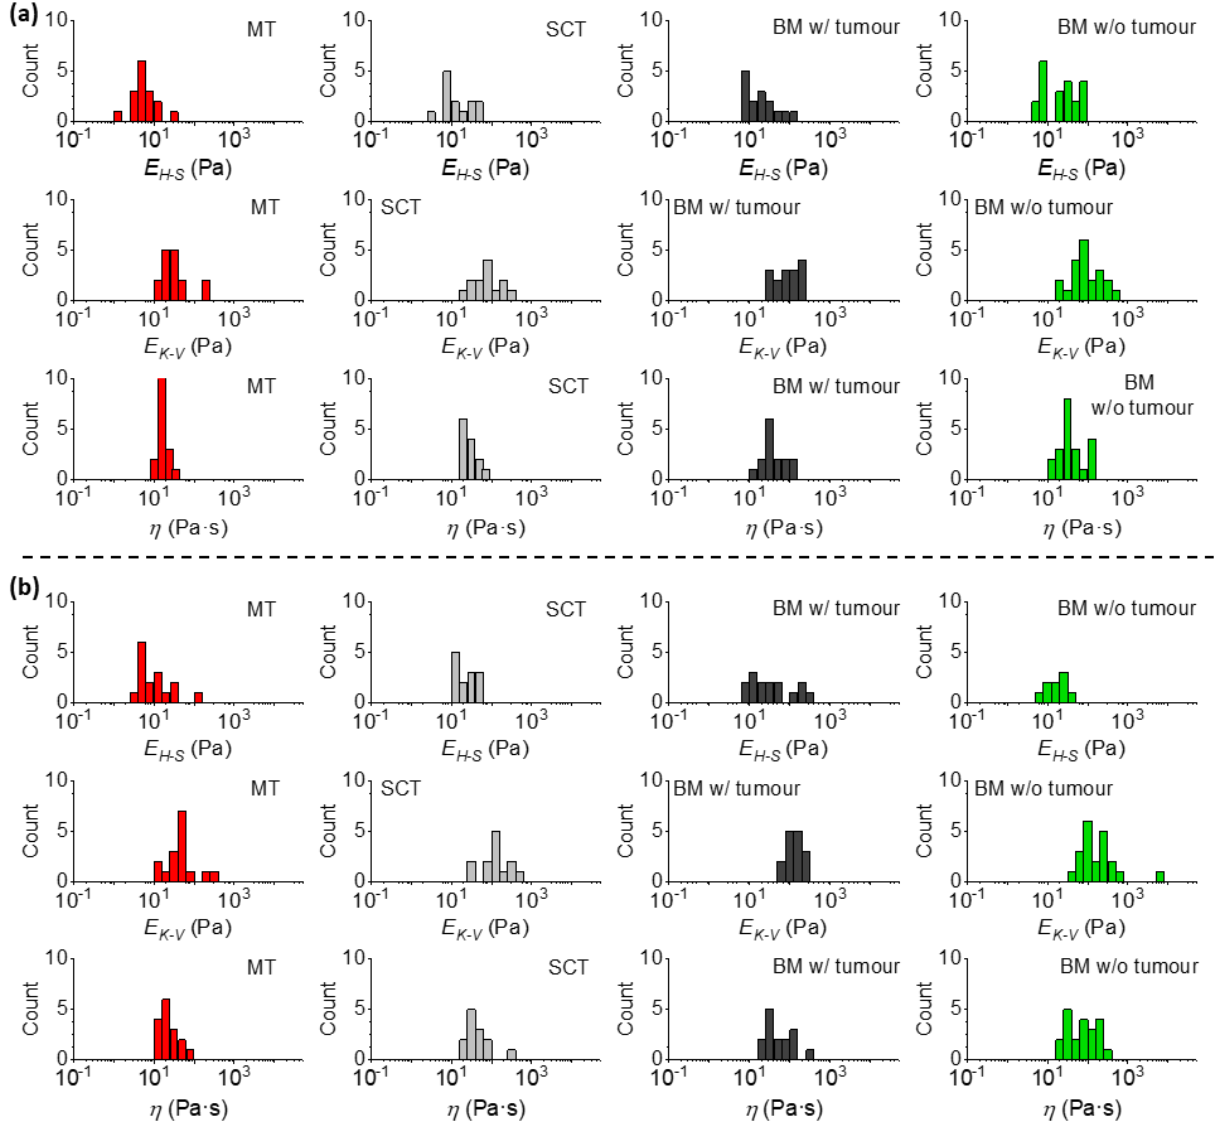

**Figure S2.** Mechanical variations between samples. Histograms of the Young's moduli  $E_{H-S}$ ,  $E_{K-V}$  and viscosity  $\eta$  of the metastatic tumour in bone (MT), subcutaneous tumour (SCT), the bone metaphysis surrounding tumour (BM w/ tumour) and bone metaphysis from tumour-free mice (BM w/o tumour), represent (a) the median and (b) the mean values of each property calculated for each sample (i.e. each piece of bone or subcutaneous tumour).

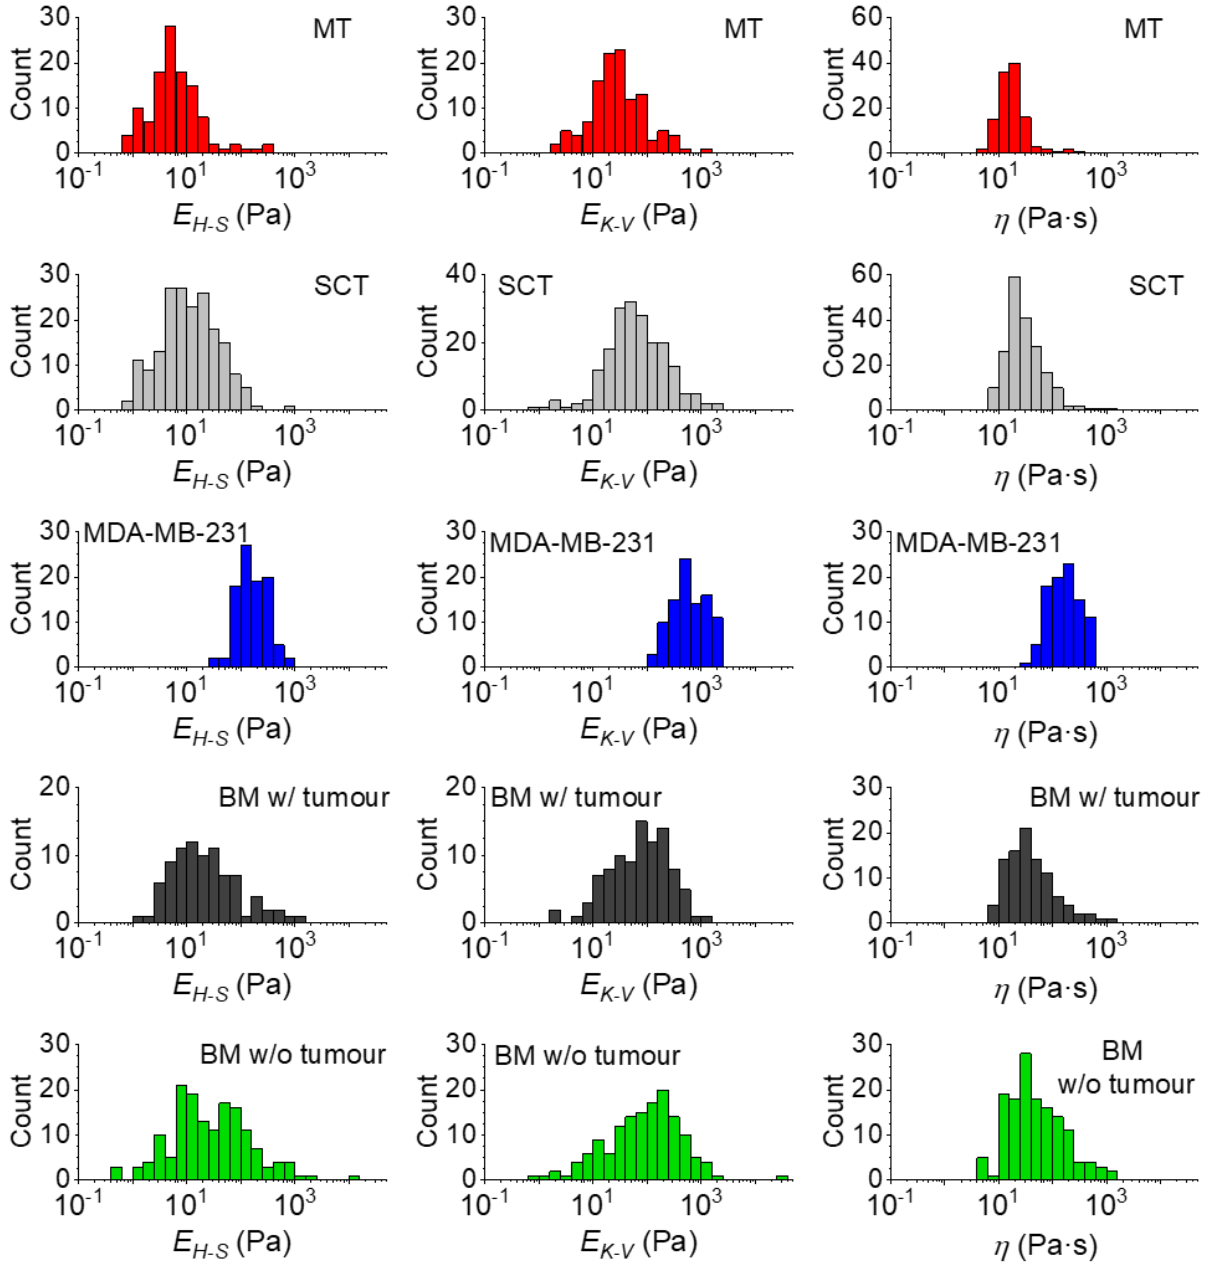

**Figure S3.** Histograms of the Young's moduli  $E_{H-S}$ ,  $E_{K-V}$  and viscosity  $\eta$  of the metastatic tumour in bone (MT), subcutaneous tumour (SCT), MDA-MB-231<sup>luc/GFP</sup> cells grown in 2D culture in petri-dishes, the bone metaphysis surrounding tumour (BM w/ tumour) and bone metaphysis from tumour-free mice (BM w/o tumour). The data shown here are identical to those in Fig. 4, 6 and 7.



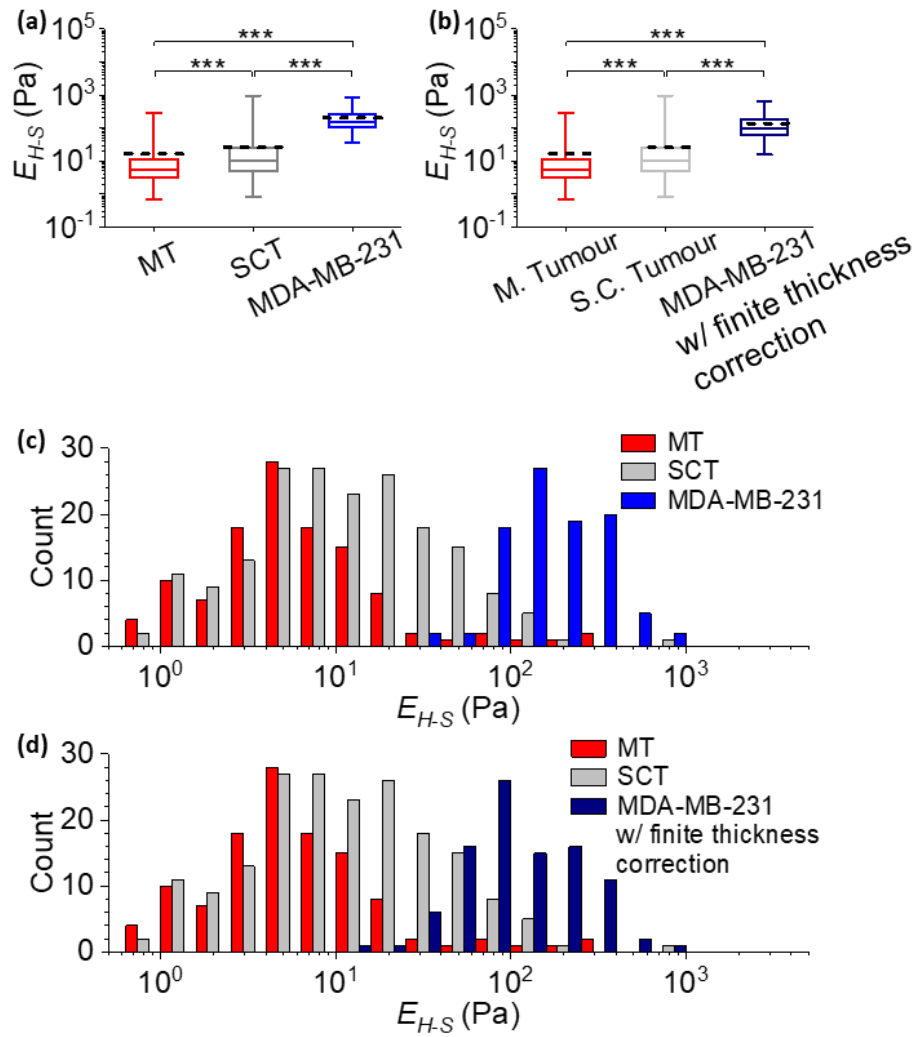

**Figure S4.** Effect of finite sample thickness on mechanical properties measured from different cancer models. (a-b) Statistical comparisons of the Young's modulus  $E_{H-S}$  of metastatic breast tumour in bone (MT), subcutaneous tumour (SCT) and MDA-MB-231<sup>luc/GFP</sup> cells grown in 2D cultures in petri-dishes (\*\*\*:  $p < 0.001$ ). (a) is identical to the top graph in Fig. 6a and the  $E_{H-S}$  of MDA-MB-231 cells are substituted by the values with finite thickness corrections in (b). The central box spans the lower to upper quartile of the data. The solid line inside the box represents the median and whiskers represent the lower and upper extremes. The mean values are indicated by dashed lines. Note the logarithmic scale of the y axes. (c-d) Histograms of the  $E_{H-S}$  of the MT, SCT and MDA-MB-231<sup>luc/GFP</sup> cells. (c) corresponds to (a) and is identical to the top graph Fig. 6b. (d) corresponds to (b). Bars in each histogram were narrowed down and shifted (i.e. a group of 3 subset bars, in order of MT, SCT and MDA-MB-231, has the same bin size in reality that equals the total width of 3 bars in the x-axis scale) to avoid stacking of columns. Note the logarithmic scale of the x axes.

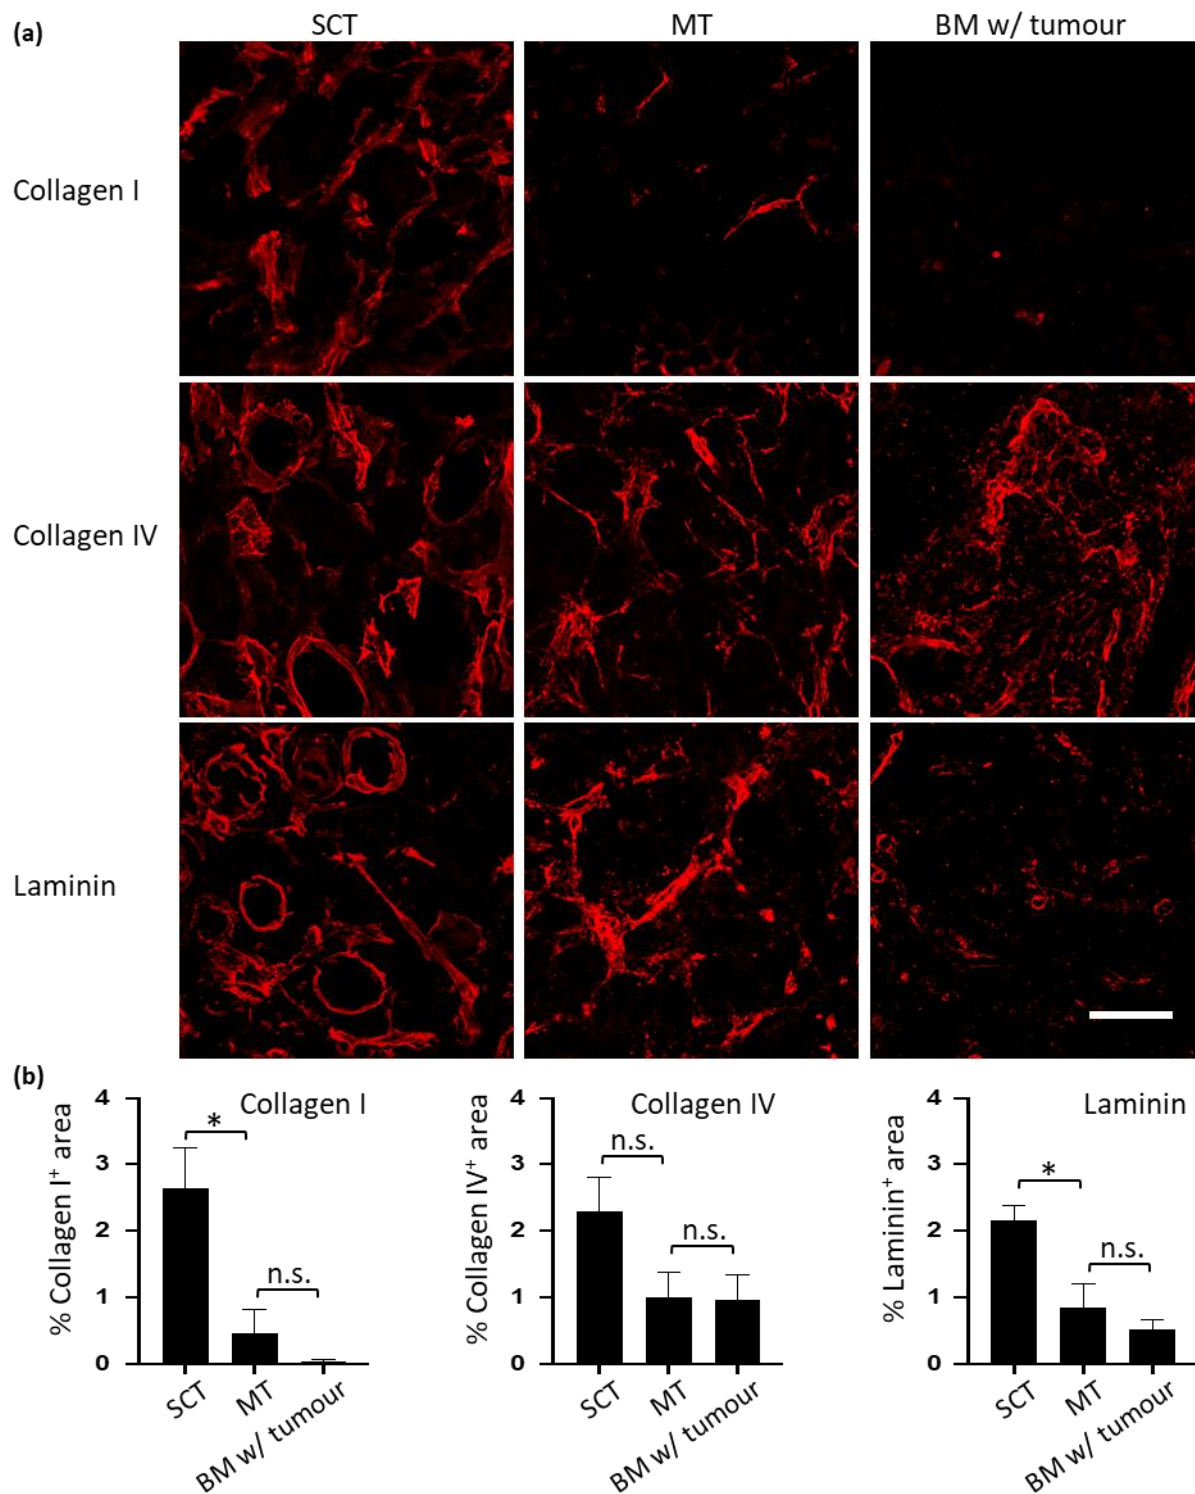

**Figure S5.** Immunofluorescent analysis of the extracellular matrices (ECM) potentially involved in cancer metastases. (a) Illustrative immunofluorescent images of Collagen I, Collagen IV and Laminin (all in *red*) obtained from the subcutaneous tumour (SCT), the metastatic tumour (MT) and the surrounding bone microenvironment (BM w/ tumour) (scale bar = 100  $\mu$ m). (b) Quantification of different ECM components (\*\*:  $p < 0.01$ ; \*:  $p < 0.05$ ; n.s.: no significance;  $n \geq 3$  per sample type).

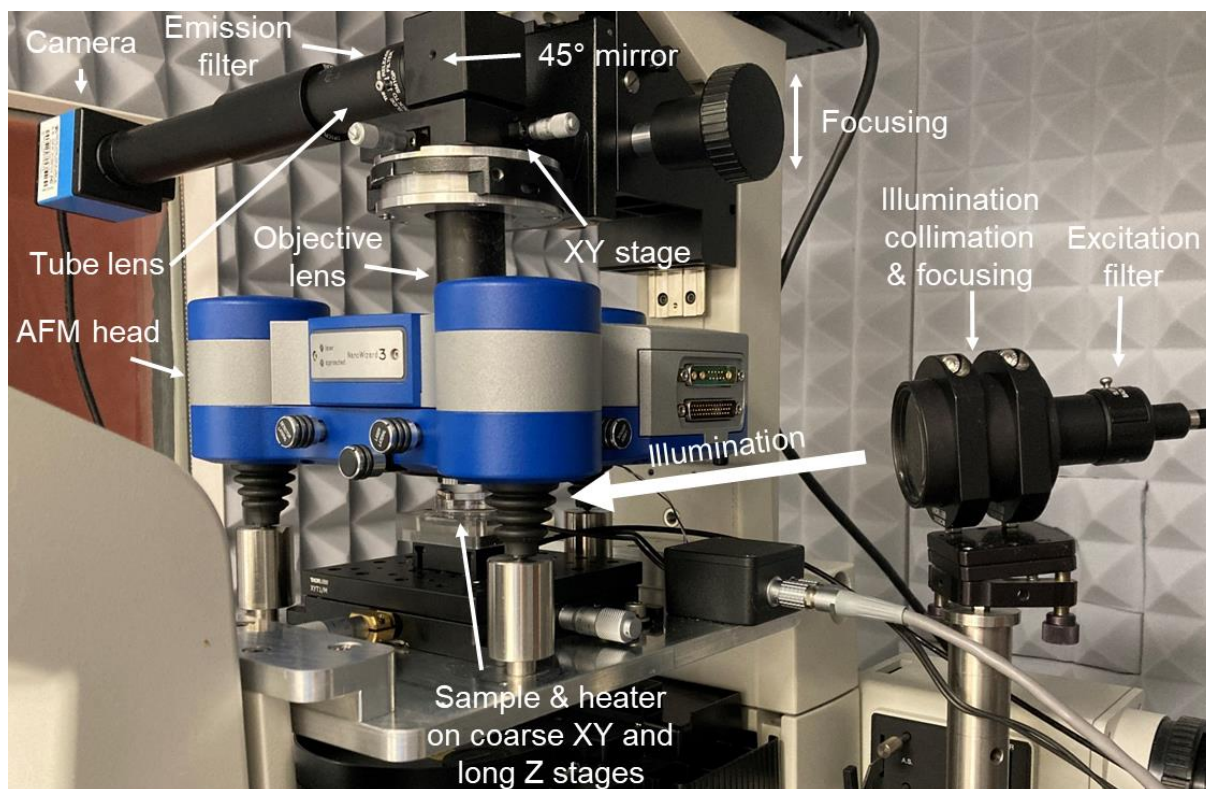

**Figure S6.** Annotated photograph of the AFM system with custom top view optics and 100  $\mu\text{m}$  range Z piezo. The cables that connect the AFM head to the controller have been removed for clarity.

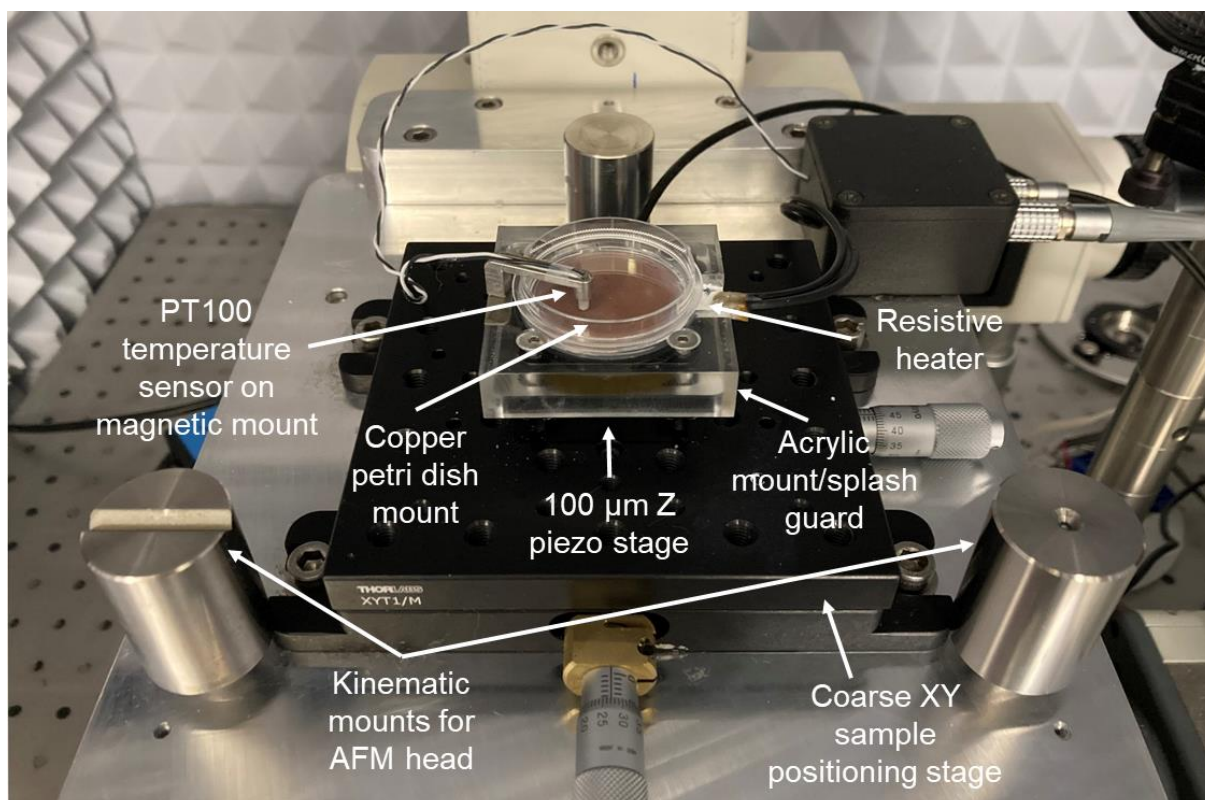

**Figure S7.** Annotated photograph of the long range Z stage, petri dish heater and coarse sample positioning stage. The AFM head has been removed for clarity. The long range z scanner is largely obscured by the acrylic mount/splash guard, and the resistive heater is obscured under the copper petri dish mount.
